# Supplementary material for: Co-Targeting ErbB Receptors and the PI3K/AKT Axis in Androgen-Independent Taxane-Sensitive and Taxane-Resistant Human Prostate Cancer Cells
Source: MDPI journal article supplement (doi:10.3390/cancers14194626), 2022-09-23
Supplement: s1 [file s1]

## Supplementary Materials:

**Supplementary Table S1.** Cell cycle analysis after 24 h treatment with the respective drugs (summary from three independent experiments)

| Cell           | Treat     | G1 (%)       | S (%)        | G2/M (%)     |
|----------------|-----------|--------------|--------------|--------------|
| <b>PC3</b>     | DMSO      | 61.12 ± 3.22 | 11.27 ± 0.60 | 24.13 ± 1.28 |
|                | MK2206    | 77.49 ± 3.23 | 4.37 ± 0.18  | 16.24 ± 0.68 |
|                | Lapatinib | 67.18 ± 2.57 | 9.31 ± 0.36  | 20.21 ± 0.77 |
|                | MK+Lap    | 75.54 ± 4.74 | 1.73 ± 0.11  | 21.53 ± 1.35 |
| <b>PC3/Pac</b> | DMSO      | 58.78 ± 3.48 | 16.06 ± 0.96 | 20.72 ± 1.24 |
|                | MK2206    | 84.37 ± 4.52 | 3.67 ± 0.20  | 10.11 ± 0.54 |
|                | Lapatinib | 69.20 ± 3.24 | 10.17 ± 0.48 | 17.34 ± 0.82 |
|                | MK+Lap    | 78.05 ± 6.16 | 4.16 ± 0.39  | 15.75 ± 1.25 |

  

| Cell             | Treat     | G1 (%)       | S (%)        | G2/M (%)     |
|------------------|-----------|--------------|--------------|--------------|
| <b>DU145</b>     | DMSO      | 53.29 ± 4.06 | 6.72 ± 0.52  | 36.42 ± 2.80 |
|                  | MK2206    | 53.29 ± 3.42 | 8.13 ± 1.07  | 34.26 ± 2.20 |
|                  | Lapatinib | 59.45 ± 4.22 | 6.12 ± 0.60  | 31.37 ± 2.33 |
|                  | MK+Lap    | 63.13 ± 3.69 | 5.15 ± 0.34  | 28.77 ± 1.68 |
| <b>DU145/Doc</b> | DMSO      | 59.61 ± 4.38 | 15.98 ± 4.20 | 20.15 ± 0.84 |
|                  | MK2206    | 64.63 ± 1.58 | 13.20 ± 2.52 | 17.30 ± 2.64 |
|                  | Lapatinib | 61.06 ± 1.41 | 9.59 ± 3.98  | 24.29 ± 3.50 |
|                  | MK+Lap    | 70.80 ± 1.70 | 8.25 ± 0.90  | 16.63 ± 1.73 |

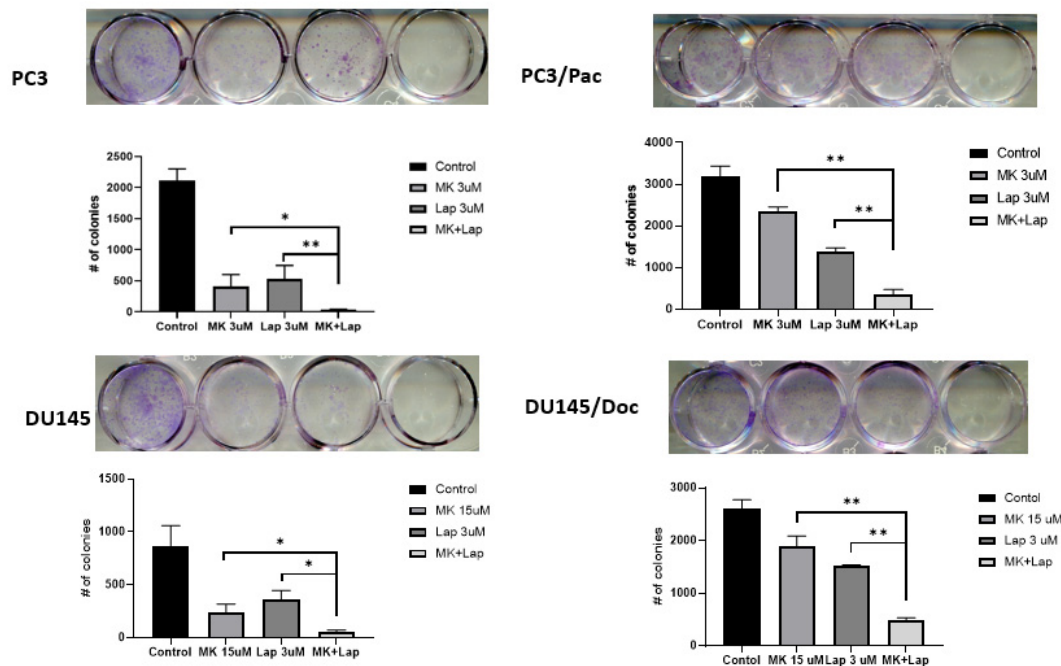

**Supplementary Figure S1.** 2D Clonogenic assays. Cells seeded in 12-well plates in triplicates were treated with the respective drugs as shown for 10 days. The colonies were then stained with crystal violet, photo-graphed and quantified using ImageJ software. Experiments were repeated three independent times. PC3, PC3/Pac cells were treated with DMSO, lapatinib 3  $\mu$ M, MK2206 6  $\mu$ M, or both. DU145, DU145/Doc cells were treated with DMSO, lapatinib 3  $\mu$ M, MK2206 15  $\mu$ M, or both. \* p-value < 0.05. \*\* p < 0.01.

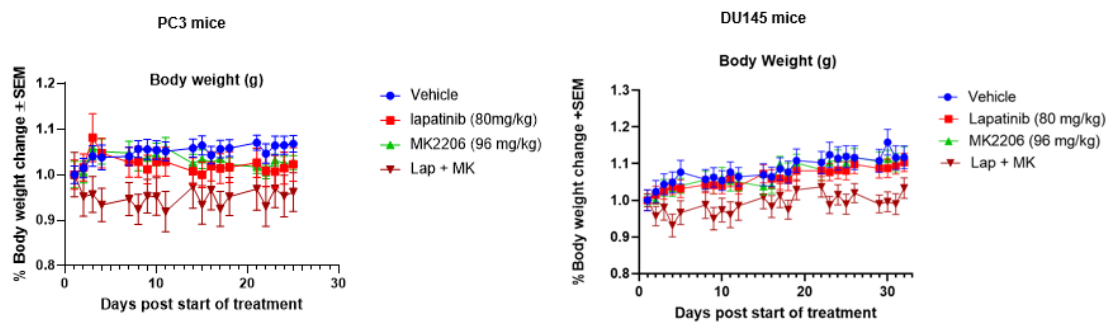

**Supplementary Figure S2.** Total mouse body weights (in grams) for the different treatment groups assessed M-F of each week.

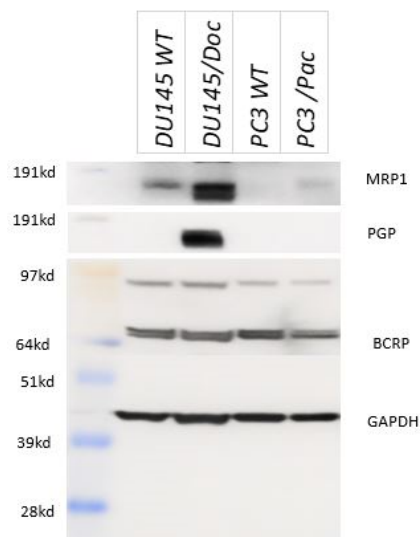

**Supplementary Figure S3.** Original western blot for Figure 1A showing the bands with molecular weight markers.

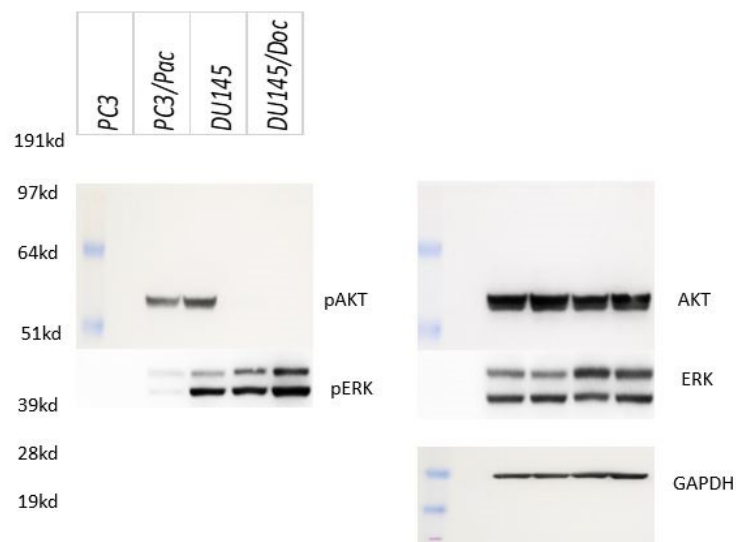

**Supplementary Figure S4.** Original western blot for Figure 2A showing the bands with molecular weight markers.

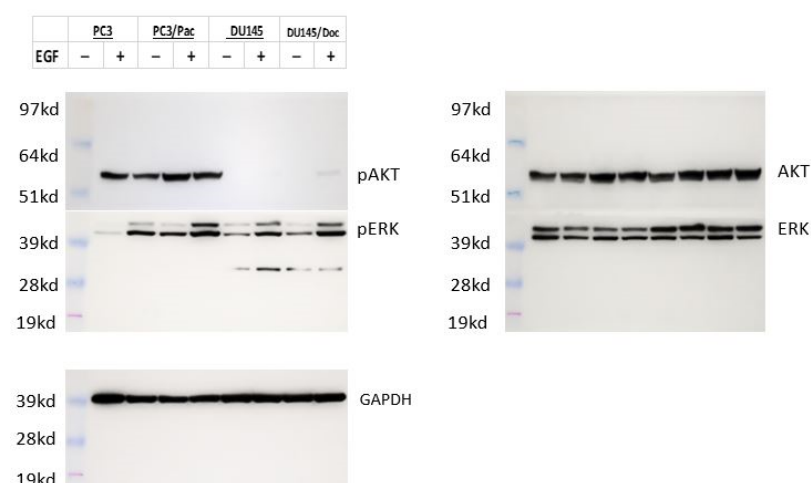

**Supplementary Figure S5.** Original western blot for Figure 2B showing the bands with molecular weight markers

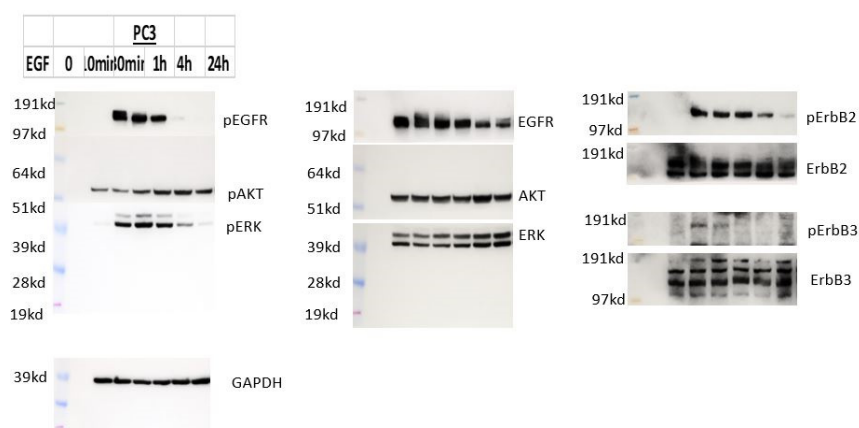

**Supplementary Figure S6.** Original western blots for Figure 2C showing the bands with molecular weight markers (PC3 cells)

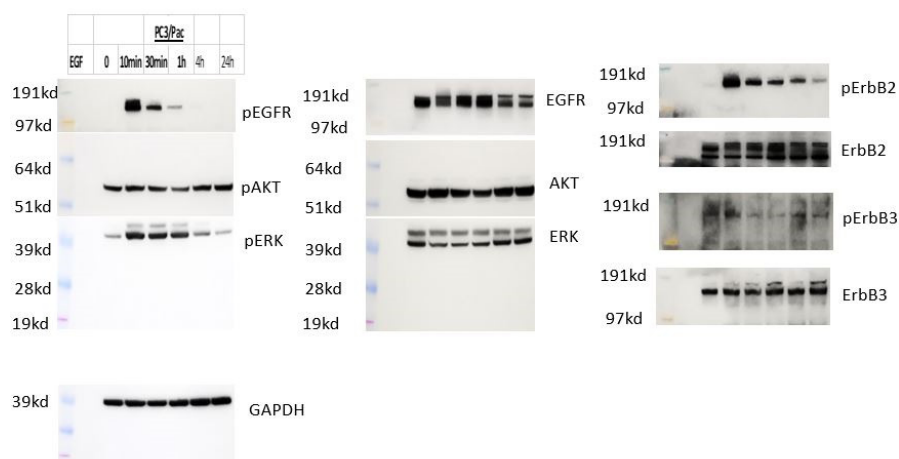

**Supplementary Figure S7.** Original western blots for Figure 2C showing the bands with molecular weight markers (PC3/Pac cells)

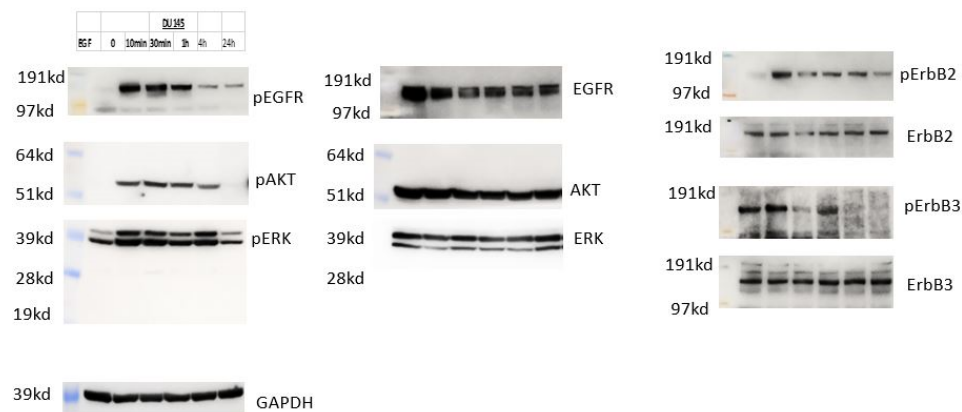

**Supplementary Figure S8.** Original western blots for Figure 2D showing the bands with molecular weight markers (DU145 cells)

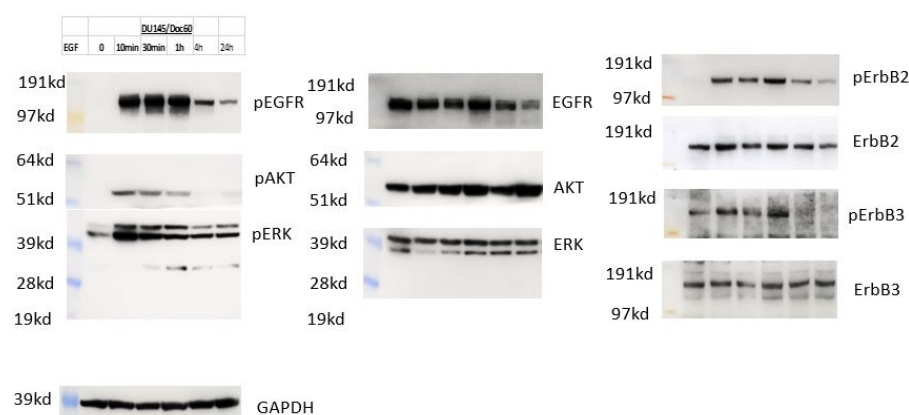

**Supplementary Figure S9.** Original western blots for Figure 2D showing the bands with molecular weight markers (DU145/Doc cells)

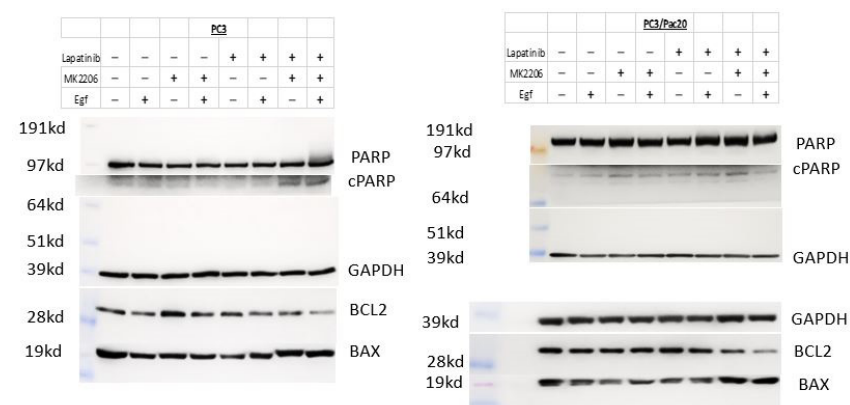

**Supplementary Figure S10.** Original western blots for Figure 3F showing the bands with molecular weight markers (PC3 and PC3/Pac cells)

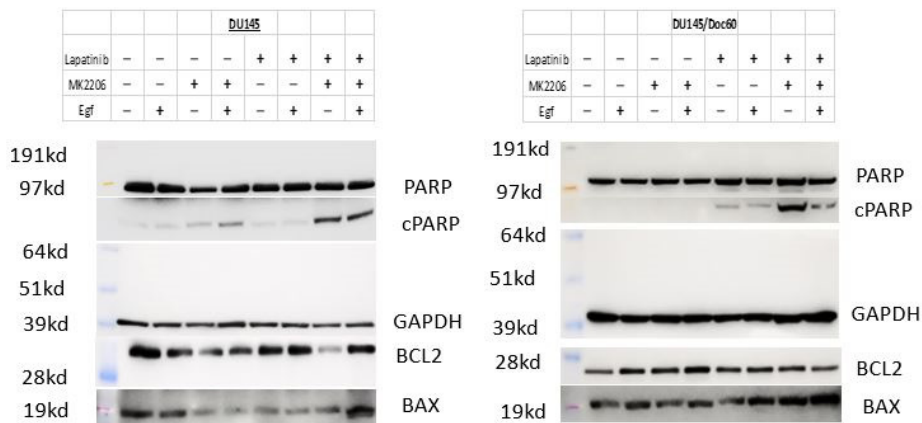

**Supplementary Figure S11.** Original western blots for Figure 3G showing the bands with molecular weight markers (DU145 and DU145/Doc cells)

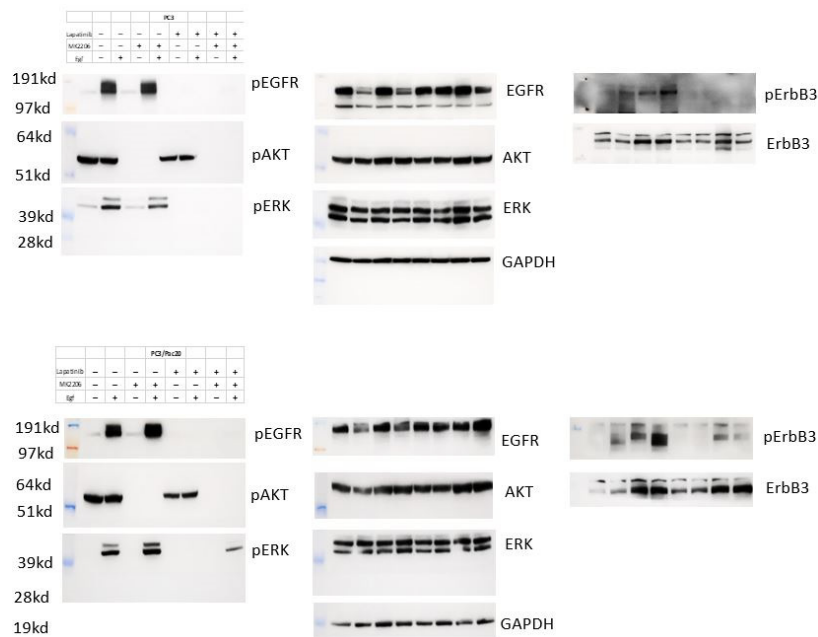

**Supplementary Figure S12.** Original western blots in Figure 4A, B showing the bands with molecular weight markers (PC3 and PC3/Pac cells)

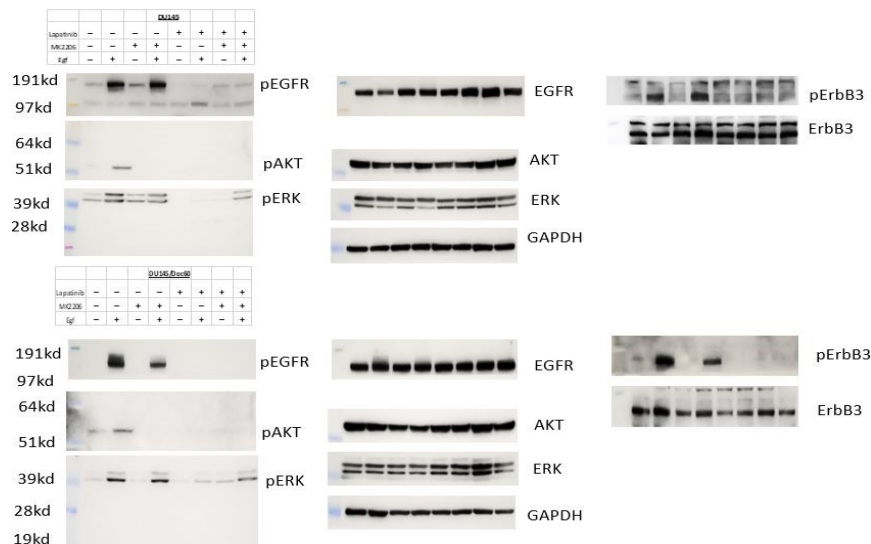

**Supplementary Figure S13.** Original western blots in Figure 5A, B showing the bands with molecular weight markers (DU145 and DU145/Doc cells)

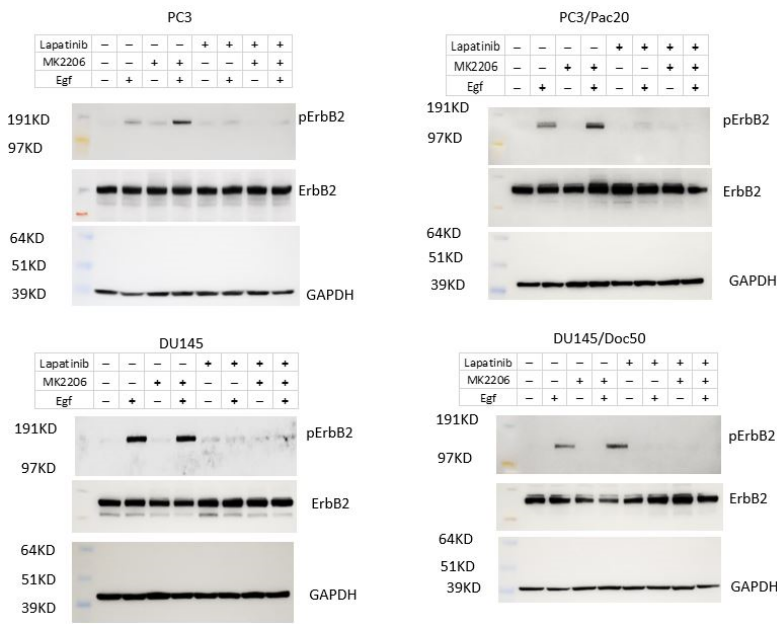

**Supplementary Figure S14.** Original western blots in Figure 4A, B (PC3, PC3/Pac) and Figure 5A, B (DU145, DU145/Doc) showing the bands with molecular weight markers

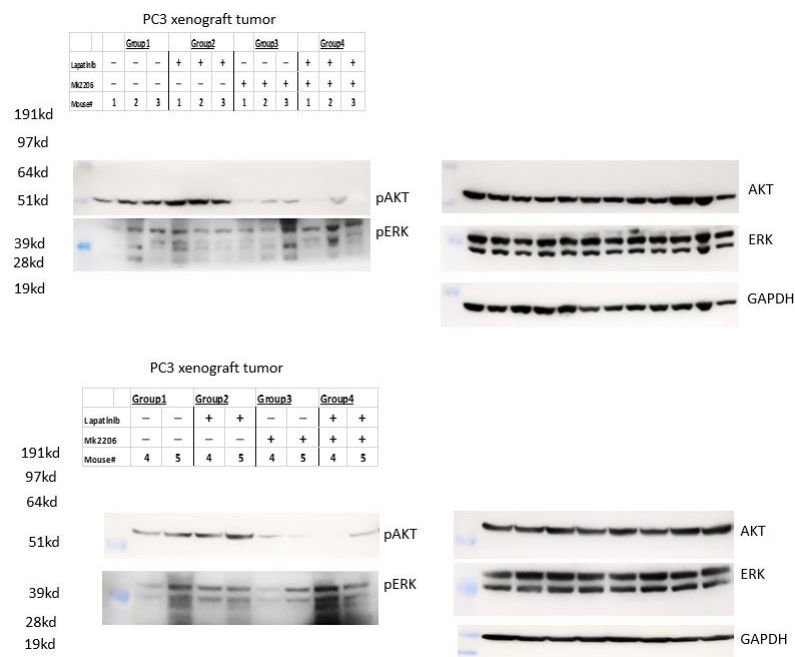

**Supplementary Figure S15.** Original western blots in Figure 6E showing the bands with molecular weight markers (PC3 xenograft tumors)

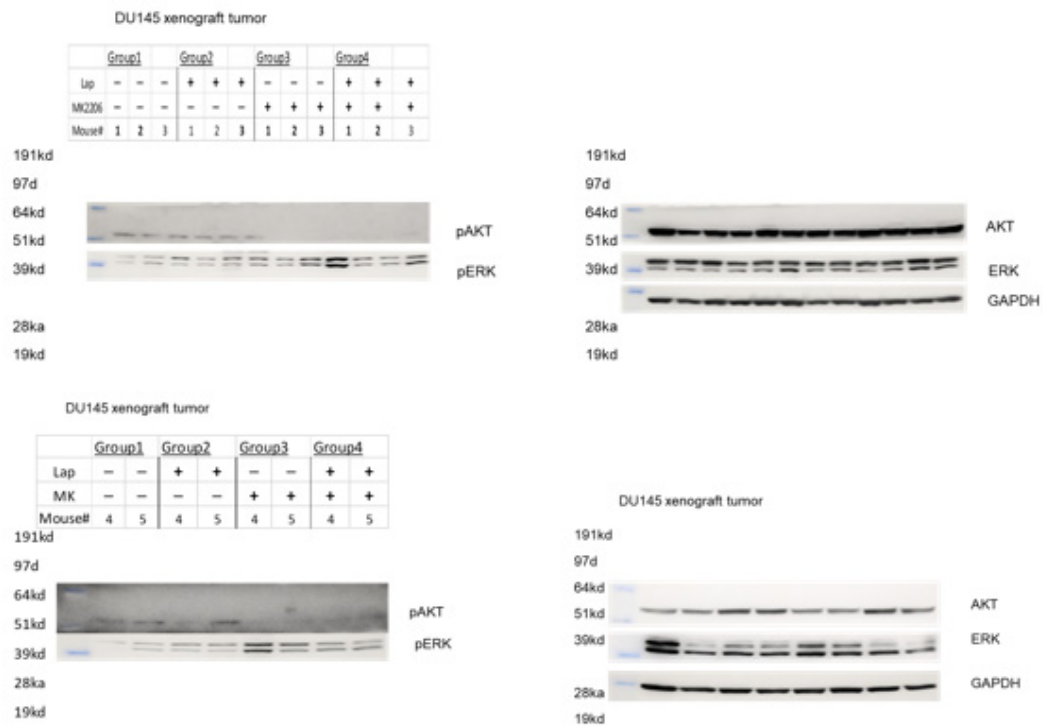

**Supplementary Figure S16.** Original western blots in Figure 6F showing the bands with molecular weight markers (DU145 xenograft tumors).

**Supplementary Table S2.** Cell Line authentication report for PC3

**Allele Table**

| <b>Locus</b> | <b>PC3</b>      | <b>ATCC Reference<br/>PC-3Prostate Adenocarcinoma Human<br/>(CRL-1435)</b> |
|--------------|-----------------|----------------------------------------------------------------------------|
| Amelogenin   | X               | X                                                                          |
| CSF1PO       | 11              | 11                                                                         |
| D13S317      | 11              | 11                                                                         |
| D16S539      | 11              | 11                                                                         |
| D21S11       | 29,31.2         | No Data                                                                    |
| D5S818       | 13              | 13                                                                         |
| D7S820       | 8,11            | 8,11                                                                       |
| TH01         | 6,7             | 6,7                                                                        |
| TPOX         | 8,9             | 8,9                                                                        |
| vWA          | 17              | 17                                                                         |
| Mouse Marker | <b>Negative</b> |                                                                            |

**Interpretation**

The sample provided exhibits identical genetic profiles.

Sample PC3 shares 12 alleles of 12 alleles (100.0 %) with the ATCC references.

The submitted profile is an exact match for the following ATCC human cell line(s) in the ATCC STR database (8 core loci plus Amelogenin): ATCC Reference PC-3 Prostate Adenocarcinoma Human (CRL-1435).



**Supplementary Table S3.** Cell Line authentication report for DU145

**Allele Table**

| Locus        | DU145    | ATCC Reference<br>DU 145Prostate Carcinoma Human (HTB-81) |
|--------------|----------|-----------------------------------------------------------|
| Amelogenin   | X,Y      | X,Y                                                       |
| CSF1PO       | 10,11    | 10,11                                                     |
| D13S317      | 12,13,14 | 12,13,14                                                  |
| D16S539      | 11,13    | 11,13                                                     |
| D21S11       | 30,33    | No Data                                                   |
| D5S818       | 10,13    | 10,13                                                     |
| D7S820       | 7,10,11  | 7,10,11                                                   |
| TH01         | 7        | 7                                                         |
| TPOX         | 11       | 11                                                        |
| vWA          | 17,18,19 | 17,18,19                                                  |
| Mouse Marker | Negative |                                                           |

**Interpretation**

The sample provided exhibits identical genetic profiles.

Sample DU145 shares 19 alleles of 19 alleles (100.0 %) with the ATCC reference.

The submitted profile is an exact match for the following ATCC human cell line(s) in the ATCC STR database (8 core loci plus Amelogenin): ATCC Reference DU 145Prostate Carcinoma Human (HTB-81).

**Supplementary Table S4.** Primary and secondary antibody list, company, catalog number and dilutions

| <b>Antibody</b>          | <b>Company Name</b> | <b>Catalog Number</b> | <b>Dilution</b> |
|--------------------------|---------------------|-----------------------|-----------------|
| <b>Primary</b>           |                     |                       |                 |
| <b>pAKT</b>              | Cell Signaling      | 9271                  | 1:1000          |
| <b>AKT</b>               | Cell Signaling      | 92712                 | 1:1000          |
| <b>pERK</b>              | Cell Signaling      | 9106                  | 1:2000          |
| <b>ERK</b>               | Cell Signaling      | 9102                  | 1:1000          |
| <b>pEGFR</b>             | Cell Signaling      | 2235                  | 1:1000          |
| <b>EGFR</b>              | Cell Signaling      | 2232                  | 1:1000          |
| <b>pErbB2</b>            | Cell Signaling      | 2247                  | 1:1000          |
| <b>ErbB2</b>             | Proteintech         | 18299-1-AP            | 1:1000          |
| <b>pErbB3</b>            | Cell Signaling      | 4791                  | 1:1000          |
| <b>ErbB3</b>             | Cell Signaling      | 4754                  | 1:1000          |
| <b>PARP/Cleaved PARP</b> | Cell Signaling      | 9542                  | 1:1000          |
| <b>BCL2</b>              | Cell Signaling      | 15071                 | 1:1000          |
| <b>BAX</b>               | Cell Signaling      | 2772                  | 1:1000          |
| <b>PGP</b>               | Sigma-Aldrich       | P7965                 | 1:1000          |
| <b>BCRP</b>              | Sigma-Aldrich       | B7185                 | 1:1000          |
| <b>MRP1</b>              | Santa Cruz          | 18835                 | 1:1000          |
| <b>GAPDH</b>             | Cell Signaling      | 2118                  | 1:2000          |
| <b>Secondary</b>         |                     |                       |                 |
| <b>Anti-mouse</b>        | SeraCare            | 5450-0011             | 1:10,000        |
| <b>Anti-rabbit</b>       | SeraCare            | 5450-0010             | 1:10,000        |
